# Supplementary material for: A three-dimensional bioprinted model to evaluate the effect of stiffness on neuroblastoma cell cluster dynamics and behavior
Source: PubMed Central journal article supplement (PMC7156444; doi:10.1038/s41598-020-62986-w), 2020-04-14
Supplement: 41598_2020_62986_MOESM1_ESM.pdf [file 41598_2020_62986_MOESM1_ESM.pdf]

**Title:** A three-dimensional bioprinted model to evaluate the effect of stiffness on neuroblastoma cell cluster dynamics and behavior

**Authors:** Ezequiel Monferrer<sup>a, b#</sup>, Susana Martín-Vañó<sup>a, b#</sup>, Aitor Carretero<sup>a#</sup>, Andrea García-Lizarribar<sup>c, e</sup>, Rebeca Burgos-Panadero<sup>a, b</sup>, Samuel Navarro<sup>a, b</sup>, Josep Samitier<sup>c, d, e\*</sup>, Rosa Noguera<sup>a, b\*</sup>

## **Supplementary Figure legends**

**Supplementary Figure 1.** Variation in percentage of the Young's modulus at 37°C from the Young's Modulus calculated at room temperature in the three hydrogel types. b) Characterization of the Young's modulus of the composite hydrogels, cohort of HR-NB and orthotopic NB mice tumors. Comparative Young's modulus of 5% gelatin methacrylated with 0%, 1% and 2% methacrylated alginate in absence and presence of incubated SK-N-BE(2) cells. Measurements of each hydrogel were performed in quintuplicate. Values are plotted as mean and standard deviation. Statistical analysis using *t-student* test: <sup>ns</sup> *p*-value > 0.05, <sup>\*\*</sup> *p*-value < 0.01, <sup>\*\*\*</sup> *p*-value < 0.001, comparing SK-NB-E (2) and no cell-hydrogels, <sup>###</sup> *p*-value < 0.001, comparing NB patients vs SK-NB-E(2) hydrogels and <sup>\$\$\$</sup> *p*-value < 0.001, comparing orthotopic NB mice tumors vs SK-NB-E(2) hydrogels.

**Supplementary Figure 2.** Example of hydrogel cluster measurement using Panoramic Viewer. Red circle marks each hydrogel cluster. Hydrogel HE staining (15x).

**Supplementary Figure 3.** Diagram of methodology used. 1. Hydrogel bioprinting; 2. Young's modulus measurement and paraffin embedding; 3. Immunohistochemistry; 4. Digitation and microscopic studies; 5. Analysis and quantification.

**Supplementary Figure 4.** Characterization of bioprinted hydrogels. Percentage of clusters (a1-a5), cluster density (b1-b5) and percentage of occupancy (c1-c5) for each cluster size (ranges: <400, 400-2,000, > 2,000  $\mu\text{m}^2$ ). (a, b, c: 1-3) Study over time within the same stiffness; (a, b, c: 4-5) Study of stiffness over the same timeframe. (d1-d2) Porosity of bioprinted hydrogels: d1) Study over time within the same stiffness; d2) Study of stiffness within the same timeframe. Values are plotted as mean and standard error of the mean.

**Supplementary Figure 5.** Study of cell proliferation in each cluster size (ranges: <400, 400-2,000, > 2,000  $\mu\text{m}^2$ ). Percentage of negative and positive cells for a) Ki67 and b) PTBP1. Results

expressed as percentage cells represent total number of cells, differentiating between cluster size. White bars: negative cells; Black bars: positive cells. Statistical analysis using  $\chi^2$  test: \*  $p$ -value < 0.05, \*\*  $p$ -value < 0.01, \*\*\*  $p$ -value < 0.001.

**Supplementary Figures**

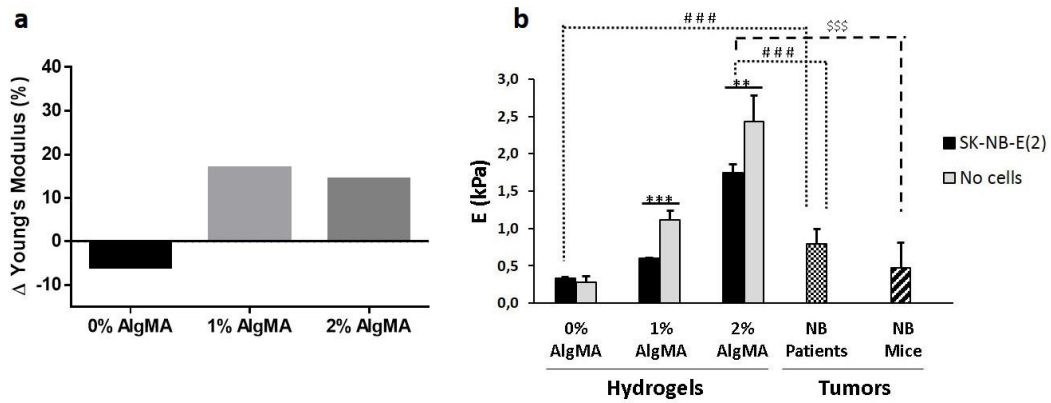

**Supplementary Figure 1**

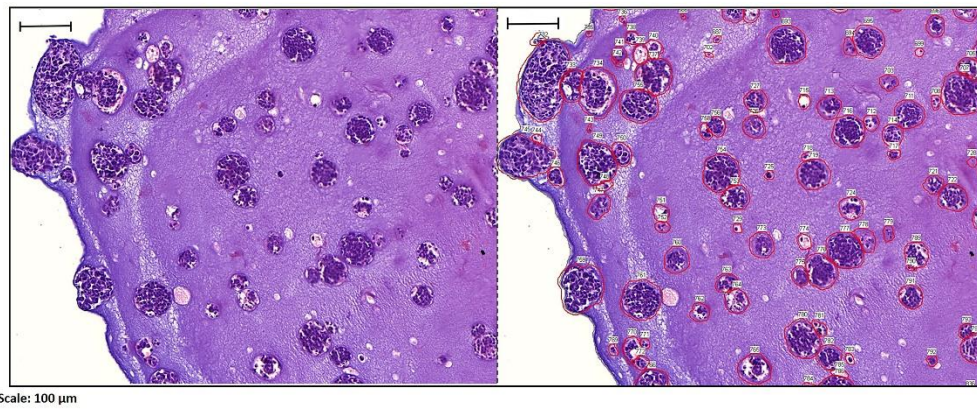

**Supplementary Figure 2**

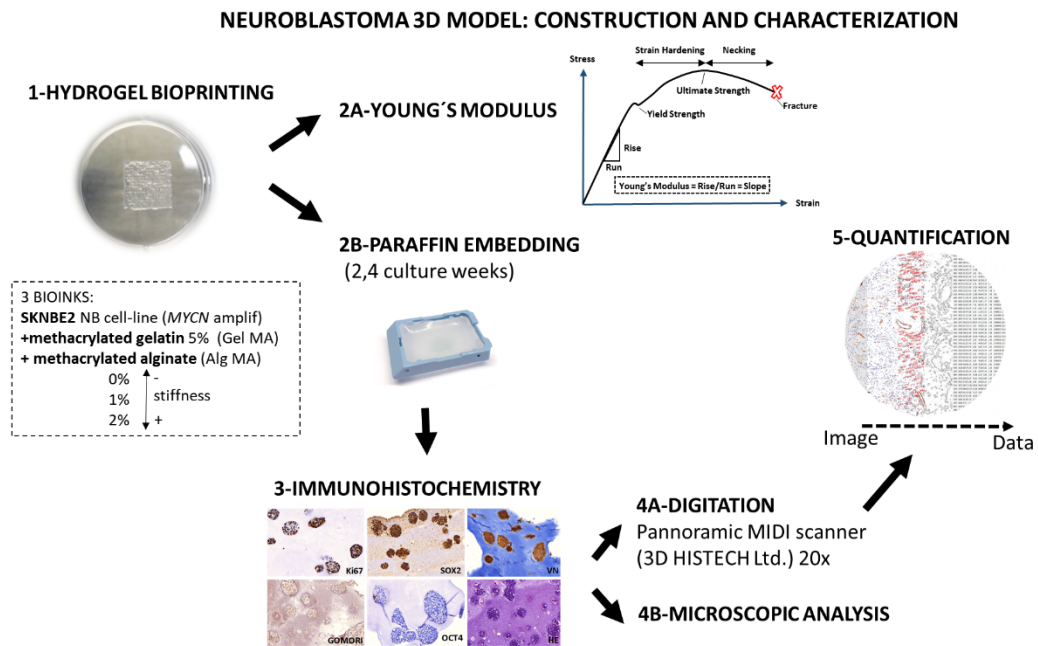

**Supplementary Figure 3**

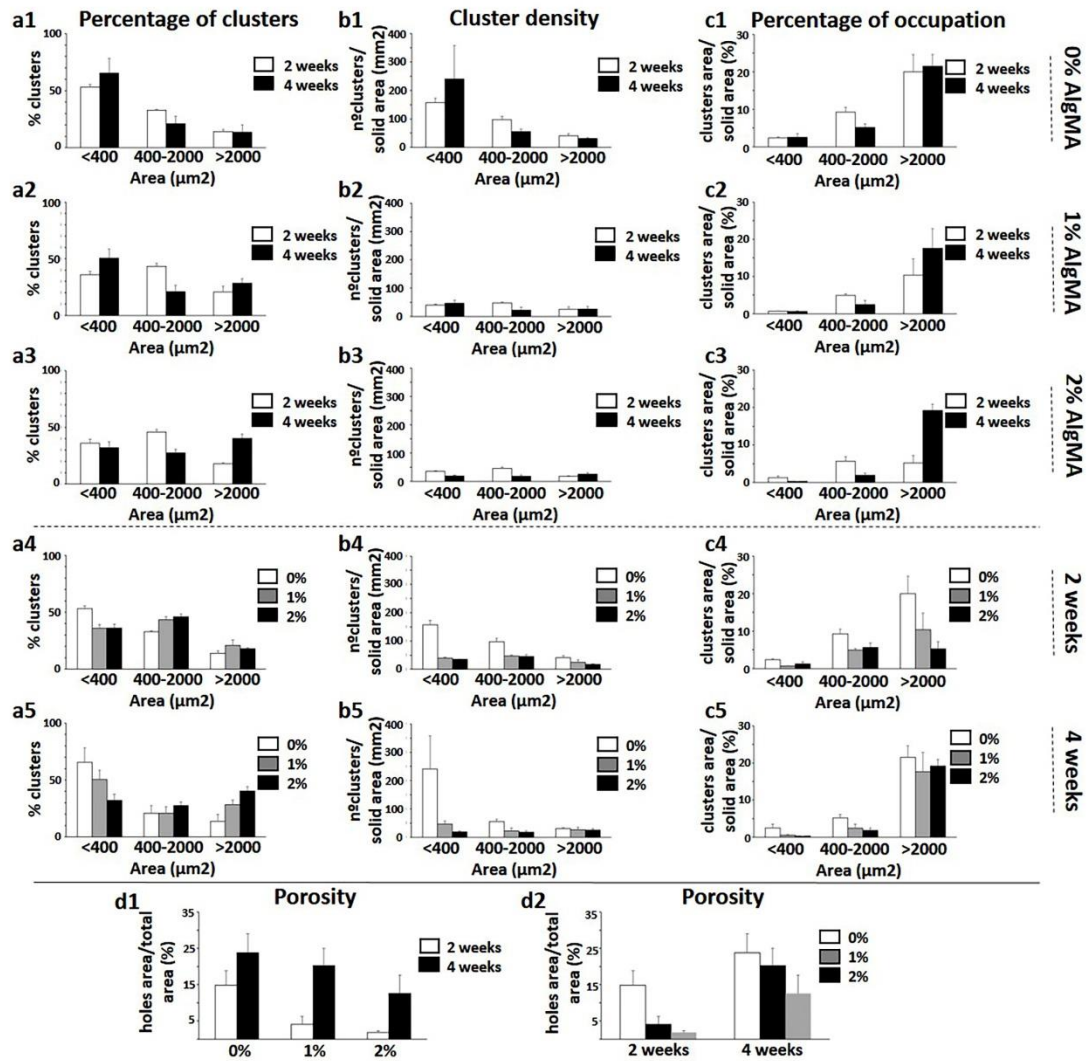

Supplementary Figure 4

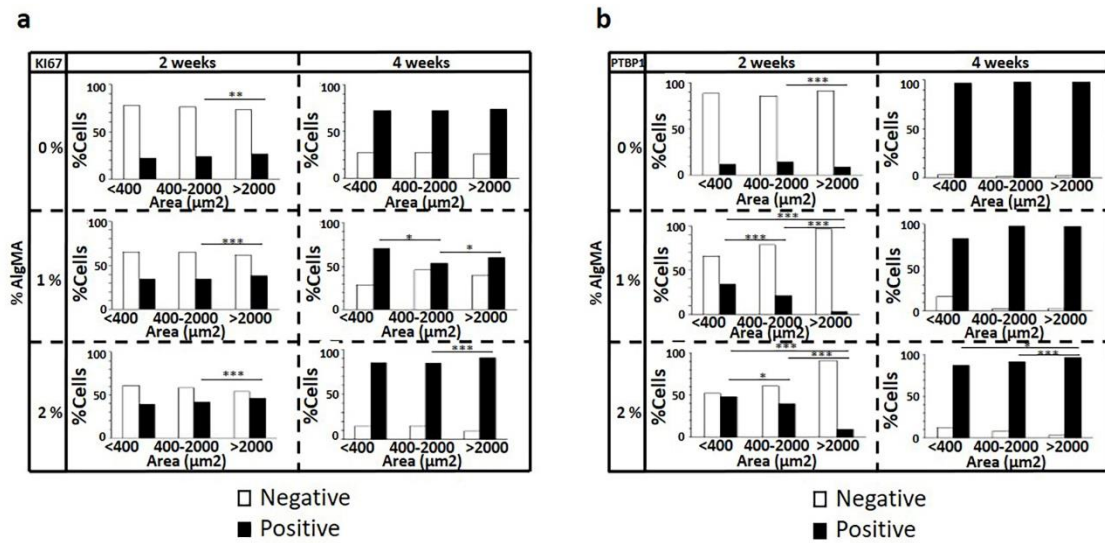

Supplementary Figure 5
